# Supplementary material for: Ultrathin and flexible hybrid films decorated by copper nanoparticles with a sandwich-like structure for electromagnetic interference shielding
Source: Royal Society of Chemistry journal article supplement (doi:10.1039/d2qm00421f), 2022-01-01
Supplement: d2qm00421f1.pdf [file d2qm00421f1.pdf]

**Supplementary Information for**

**Ultrathin and Flexible Hybrid Film Decorated by Copper  
Nanoparticles with Sandwich-like Structure for  
Electromagnetic Interference Shielding**

Mengmeng Wang, Xiao You, Chunjing Liao, Xiaoyin Ren, Faxian Xiu\*, Jinshan  
Yang\*, and Shaoming Dong\*

M. Wang, X. You, J. Yang, S. Dong

State Key Laboratory of High Performance Ceramics & Superfine Microstructure,  
Shanghai Institute of Ceramics, Chinese Academy of Sciences, Shanghai 200050,  
China

Center of Materials Science and Optoelectronics Engineering, University of Chinese  
Academy of Sciences, Beijing 100049, China

Structural Ceramics and Composites Engineering Research Center, Shanghai Institute  
of Ceramics, Chinese Academy of Sciences, Shanghai 200050, China

E-mail: [jyang@mail.sic.ac.cn](mailto:jyang@mail.sic.ac.cn), [smdong@mail.sic.ac.cn](mailto:smdong@mail.sic.ac.cn)

C. Liao, X. Ren

Structural Ceramics and Composites Engineering Research Center, Shanghai Institute  
of Ceramics, Chinese Academy of Sciences, Shanghai 200050, China

F. Xiu

State Key Laboratory of Surface Physics and Department of Physics, Fudan  
University, Shanghai 200433, China

E-mail: [faxian@fudan.edu.cn](mailto:faxian@fudan.edu.cn)

### **Highlights of the paper**

- CNT/Cu hybrid films are prepared via one-step electrodeposition method.
- The CNT/Cu hybrid films show a sandwich-like morphology.
- The resistance of CNT/Cu hybrid film is very close to that of pure copper foil.
- The CNT/Cu hybrid films show absolute shielding effectiveness of  $32550 \text{ dB cm}^2 \text{ g}^{-1}$

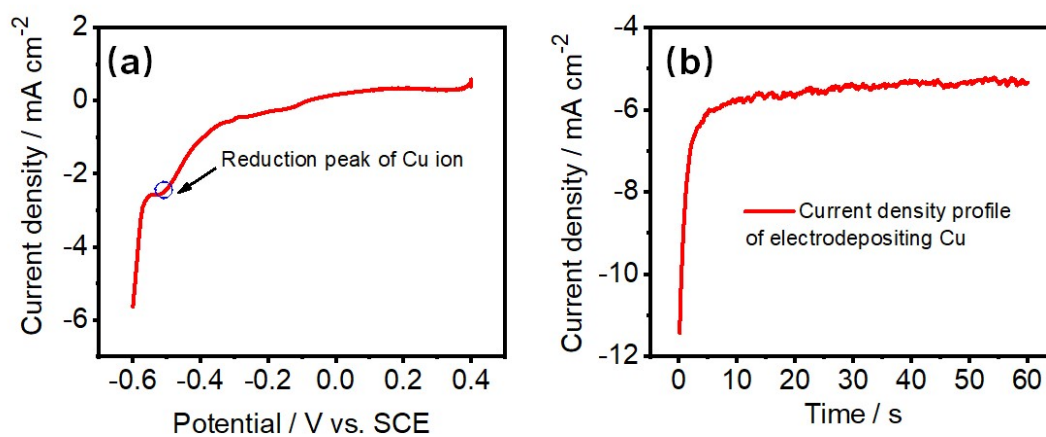

**Figure S1.** a) The Linear sweep voltammetry curves of Cu on CNT film from 0.4 V to -0.6 V vs. SCE. b) The current density profile of electroplating Cu.

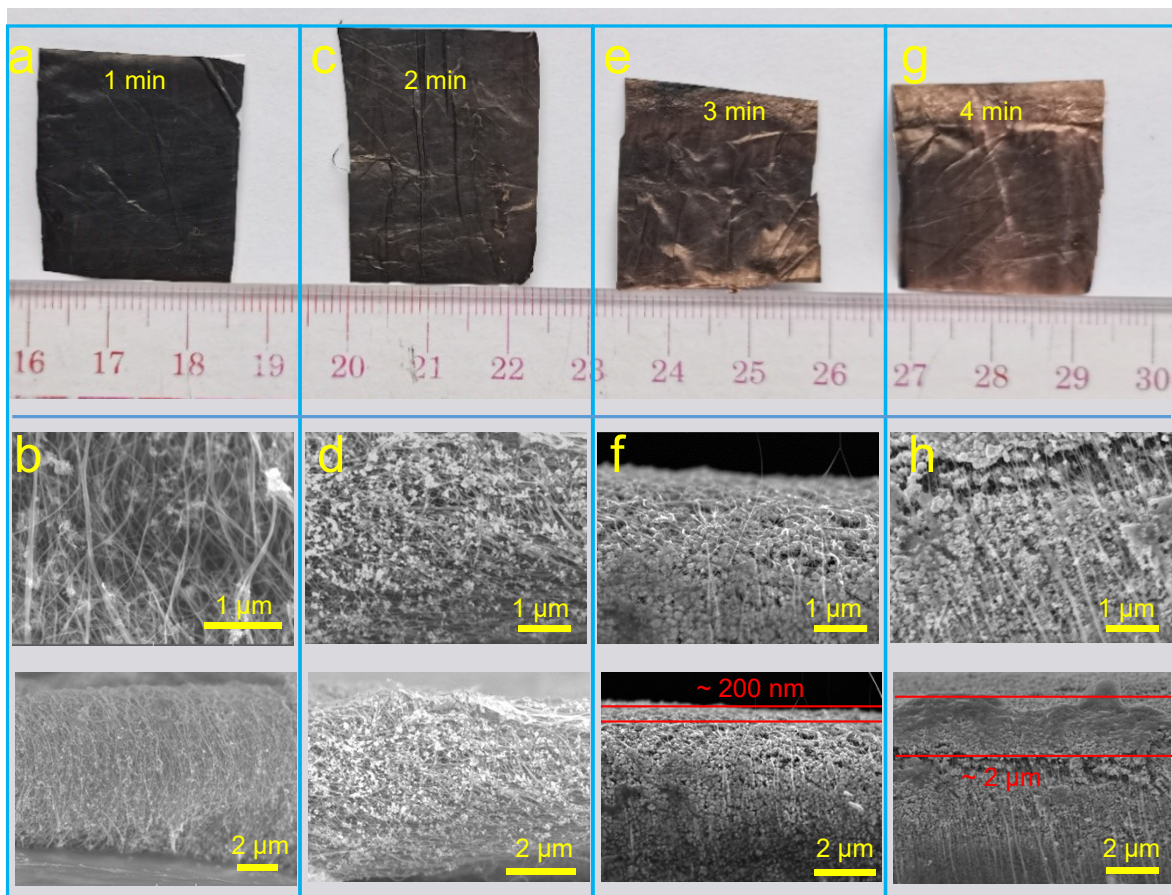

**Figure S2.** The photographs of CNT/Cu hybrid film after (a) 1 min, (c) 2 min, (e) 3 min and (g) 4 min electrodeposition. The breaking morphology of (b) CNT/Cu1, (d) CNT/Cu2, (f) CNT/Cu3, (h) CNT/Cu4.

**Supplementary Table 1.** Summary of electrical conductivity and surface density for CNT foils, CNT/Cu foils, and Cu paper.

| Sample              | Conductivity<br>(S cm <sup>-1</sup> ) | Surface density<br>(g cm <sup>-2</sup> ) | Load of Cu<br>(mg cm <sup>-2</sup> ) |
|---------------------|---------------------------------------|------------------------------------------|--------------------------------------|
| CNT paper           | 27.9                                  | 0.0011                                   | 0                                    |
| CNT/Cu <sub>1</sub> | 54.1                                  | 0.0012                                   | 0.1                                  |
| CNT/Cu <sub>2</sub> | 61.3                                  | 0.0013                                   | 0.2                                  |
| CNT/Cu <sub>3</sub> | 76.8                                  | 0.0015                                   | 0.4                                  |
| CNT/Cu <sub>4</sub> | 104.2                                 | 0.002                                    | 0.9                                  |
| copper foil         | 105.4                                 | 3.787                                    | full                                 |

**Supplementary Table 2.** Summary of the absolute effectiveness (SSE/t) in X-band versus thickness of different EMI shielding materials

|             | Filler [wt.%] | Matrix         | T [mm] | Conductivity<br>[S m <sup>-1</sup> ] | EMI SE<br>[dB] | SSE/t<br>[dB cm <sup>2</sup> g <sup>-1</sup> ] | References |
|-------------|---------------|----------------|--------|--------------------------------------|----------------|------------------------------------------------|------------|
| SWCNT       | 7             | PS             | 1.2    | 0.001                                | 18.5           | 275                                            | 1          |
| MWCNT       | 20            | PC             | 2.1    | 3                                    | 39             | 164                                            | 2          |
| MWCNT       | 20            | PS             | 2      | 0.1                                  | 30             | 285                                            | 3          |
| MWCNT       | 15            | ABS            | 1.1    | 1.235                                | 50             | 437.2                                          | 4          |
| MWCNT       | 0.5           | Carbon<br>foam | 2.75   | 150                                  | 85             | 594                                            | 5          |
| Graphene    | 10            | PEI            | 2.3    | $1.75 \times 10^{-8}$                | 12.8           | 191.3                                          | 6          |
| Graphene    | 30            | PS             | 2      | \                                    | 29             | 257.6                                          | 7          |
| Graphene    | 16            | PI             | 0.8    | 0.8                                  | 21             | 11712                                          | 8          |
| Graphene    | 7             | PS             | 2.5    | 43.5                                 | 45.1           | 692                                            | 9          |
| Graphene    | 25            | PEDOT          | 0.8    | \                                    | 70             | 841                                            | 10         |
| Graphene    | Bulk          | \              | 0.05   | 1136                                 | 62             | 15309                                          | 11         |
| MXene       | 44            | CNF            | 0.035  | 143                                  | 39.6           | 7029                                           | 12         |
| Mxene       | 20            | PVA            | 0.027  | No                                   | 44.4           | 9343                                           | 13         |
| MXene       | 2.5           | PVA            | 0.3    | $8.0 \times 10^{-4}$                 | 21             | 3867                                           | 14         |
| Mxene       | 40            | ANF            | 0.014  | \                                    | 24.5           | 8814.5                                         | 15         |
| Mxene       | 90            | CA             | 0.026  | 1.3                                  | 54.3           | 17586                                          | 16         |
| Mxene       | 90            | SA             | 0.008  | 2963                                 | 57             | 30830                                          | 17         |
| CuNi        | Bulk          | \              | 1.5    | \                                    | 25             | 690                                            | 18         |
| Graphene/Cu | Bulk          | \              | 10     | 20.83                                | 52.49          | 3170                                           | 19         |
| Ag nanowire | 0.53 (vol%)   | Cellulose      | 0.1642 |                                      | 48.6           | 5585                                           | 20         |
| Ag          | 0.51 vol%     | Silicone       | 0.7    | 279.3                                | 30.5           | 618.6                                          | 21         |

|                                          |          |        |       |       |      |        |           |
|------------------------------------------|----------|--------|-------|-------|------|--------|-----------|
| Fe <sub>3</sub> O <sub>4</sub> @MWCNTs   | 7        | PMMA   | 2.5   |       | 13.1 | 200    | 22        |
| Stainless-steel fiber                    | 1.1 vol% | PP     | 3.1   | 0.001 | 48   | 241.94 | 23        |
| Fe <sub>3</sub> O <sub>4</sub> @graphene | 10       | PEI    | 2.5   | \     | 17.8 | 166    | 24        |
| MWCNT-Fe <sub>3</sub> O <sub>4</sub>     | 2-7      | PFC2Fs | 2     | 0.02  | 62   | 2468   | 25        |
| Pd-CNT-Cu                                | 15       | Cu     | 0.2   | \     | 35   | 108    | 26        |
| MWCNT                                    | □        | Cu     | 0.005 | □     | □    | 32550  | This work |

### Supplementary Reference

1. Y. Yang, M. C. Gupta, K. L. Dudley, R. Lawrence, Novel carbon nanotube-polystyrene foam composites for electromagnetic interference shielding, *Nano Lett.*, 2005, **5**, 2131-2134
2. S. Pande, A. Chaudhary, D. Patel, B. P. Singh, R. B. Mathur, Mechanical and electrical properties of multiwall carbon nanotube/polycarbonate composites for electrostatic discharge and electromagnetic interference shielding applications, *RSC Adv.*, 2014, **4**, 13839-13849.
3. M. Arjmand, T. Apperley, M. Okoniewski, U. Sundararaj, Comparative study of electromagnetic interference shielding properties of injection molded versus compression molded multi-walled carbon nanotube/polystyrene composites, *Carbon*, 2012, **50**, 5126-5134.
4. M. H. Al-Saleh, W. H. Saadeh, U. Sundararaj, EMI shielding effectiveness of carbon based nanostructured polymeric materials: A comparative study, *Carbon*, 2013, **60**, 146
5. Q. Li, L. Chen, J. Ding, J. Zhang, X. Li, K. Zheng, X. Zhang, X. Tian, Open-cell phenolic carbon foam and electromagnetic interference shielding properties, *Carbon*, 2016, **104**, 90-105.
6. R. Kumar, S. R. Dhakate, T. Gupta, P. Saini, B. P. Singh, R. B. Mathur, Effective improvement of the properties of light weight carbon foam by decoration with multi-wall carbon nanotubes, *J. Mater. Chem. A*, 2013, **1**, 5727-5735.
7. J. Ling, W. Zhai, W. Feng, B. Shen, J. Zhang, W. Zheng, Facile preparation of lightweight microcellular polyetherimide/graphene composite foams for electromagnetic interference shielding, *ACS Appl. Mater. Interfaces*, 2013, **5**, 2677-2684.
8. D.-X. Yan, P.-G. Ren, H. Pang, Q. Fu, M.-B. Yang, Z.-M. Li, Efficient electromagnetic interference shielding of lightweight graphene/polystyrene composite, *J. Mater. Chem.*, 2012, **22**, 18772-18774
9. Y. Li, X. Pei, B. Shen, W. Zhai, L. Zhang, W. Zheng, Polyimide/graphene composite foam sheets with ultrahigh thermostability for electromagnetic interference



- shielding, *RSC Adv.*, 2015, **5**, 24342-24351.
10. D.-X. Yan, H. Pang, B. Li, R. Vajtai, L. Xu, P.-G. Ren, J.-H. Wang, Z.-M. Li, Structured Reduced Graphene Oxide/Polymer Composites for Ultra-Efficient Electromagnetic Interference Shielding, *Adv. Funct. Mater.*, 2015, **25**, 559-566.
11. N. Agnihotri, K. Chakrabarti, A. De, Highly efficient electromagnetic interference shielding using graphite nanoplatelet/poly(3,4-ethylenedioxythiophene)-poly(styrenesulfonate) composites with enhanced thermal conductivity, *RSC Adv.*, 2015, **5**, 43765-43771.
12. L. Zhang, N. T. Alvarez, M. Zhang, M. Haase, R. Malik, D. Mast, V. Shanov, Preparation and characterization of graphene paper for electromagnetic interference shielding, *Carbon*, 2015, **82**, 353-359.
13. B. Zhou, Z. Zhang, Y. Li, G. Han, Y. Feng, B. Wang, D. Zhang, J. Ma, C. Liu, Flexible, Robust, and Multifunctional Electromagnetic Interference Shielding Film with Alternating Cellulose Nanofiber and MXene Layers, *ACS Appl. Mater. Interfaces*, 2020, **12**, 4895-4905.
14. X. Jin, J. Wang, L. Dai, X. Liu, L. Li, Y. Yang, Y. Cao, W. Wang, H. Wu, S. Guo, Flame-retardant poly(vinyl alcohol)/MXene multilayered films with outstanding electromagnetic interference shielding and thermal conductive performances, *Chem. Eng. J.*, 2020, **380**, 122475.
15. H. Xu, X. Yin, X. Li, M. Li, S. Liang, L. Zhang, L. Cheng, Lightweight Ti<sub>2</sub>CTx MXene/Poly(vinyl alcohol) Composite Foams for Electromagnetic Wave Shielding with Absorption-Dominated Feature, *ACS Appl. Mater. Interfaces*, 2019, **11**, 10198-10207.
16. C. Lei, Y. Zhang, D. Liu, K. Wu, Q. Fu, Metal-Level Robust, Folding Endurance, and Highly Temperature-Stable MXene-Based Film with Engineered Aramid Nanofiber for Extreme-Condition Electromagnetic Interference Shielding Applications, *ACS Appl. Mater. Interfaces*, 2020, **12**, 26485-26495.
17. Z. Zhou, J. Liu, X. Zhang, D. Tian, Z. Zhan, C. Lu, Ultrathin MXene/Calcium Alginate Aerogel Film for High-Performance Electromagnetic Interference Shielding, *Adv. Mater. Interfaces*, 2019, **6**, 1802040.

18. F. Shahzad, M. Alhabeab, C. B. Hatter, B. Anasori, S. M. Hong, C. M. Koo, Y. Gogotsi, Electromagnetic interference shielding with 2D transition metal carbides (MXenes), *Science*, 2016, **353**, 1137-40.
19. K. Ji, H. Zhao, J. Zhang, J. Chen, Z. Dai, Fabrication and electromagnetic interference shielding performance of open-cell foam of a Cu–Ni alloy integrated with CNTs, *Appl. Surf. Sci.*, 2014, **311**, 351-356.
20. S. Wu, M. Zou, Z. Li, D. Chen, H. Zhang, Y. Yuan, Y. Pei, A. Cao, Robust and Stable Cu Nanowire@Graphene Core-Shell Aerogels for Ultraeffective Electromagnetic Interference Shielding, *Small*, 2018, **14**, 1800634.
21. T. W. Lee, S. E. Lee, Y. G. Jeong, Highly Effective Electromagnetic Interference Shielding Materials based on Silver Nanowire/Cellulose Papers, *ACS Appl. Mater. Interfaces*, 2016, **8**, 13123-32.
22. J. Yang, X. Liao, G. Wang, J. Chen, F. Guo, W. Tang, W. Wang, Z. Yan, G. Li, Gradient structure design of lightweight and flexible silicone rubber nanocomposite foam for efficient electromagnetic interference shielding, *Chem. Eng. J.*, 2020, **390**, 124589.
23. H. Zhang, G. Zhang, J. Li, X. Fan, Z. Jing, J. Li, X. Shi, Lightweight, multifunctional microcellular PMMA/Fe<sub>3</sub>O<sub>4</sub>@MWCNTs nanocomposite foams with efficient electromagnetic interference shielding, *Compos. Part A*, 2017, **100**, 128-138.
24. A. Ameli, M. Nofar, S. Wang, C. B. Park, Lightweight polypropylene/stainless-steel fiber composite foams with low percolation for efficient electromagnetic interference shielding, *ACS Appl. Mater. Interfaces*, 2014, **6**, 11091
25. B. Shen, W. Zhai, M. Tao, J. Ling, W. Zheng, Lightweight, multifunctional polyetherimide/graphene@Fe<sub>3</sub>O<sub>4</sub> composite foams for shielding of electromagnetic pollution, *ACS Appl. Mater. Interfaces*, 2013, **5**, 11383-91.
